# Supplementary material for: An application of MeSH enrichment analysis in livestock
Source: PubMed Central journal article supplement (PMC5032990; doi:10.1111/age.12307), 2015-06-02
Supplement: AGE-46-381-s001.pdf [file AGE-46-381-s001.pdf]

## APPENDIX S1

# MeSH over-representation analysis (Bovine)

This is a reproducible report written by an R Markdown.

### 1. Create a vector of all genes

We first create a vector of all genes.

```
library("org.Bt.eg.db")
key.symbol <- keys(org.Bt.eg.db, keytype = c("SYMBOL"))
entrezUniverse = select(org.Bt.eg.db, as.character(key.symbol), columns= c("ENTREZID", "ENSEMBL"),
                        keytype = "SYMBOL") # 45937
```

```
## Warning in .generateExtraRows(tab, keys, jointype): 'select' resulted in
## 1:many mapping between keys and return rows
```

```
## remove duplicated Entrez Gene ID
entrezUniverse2 <- entrezUniverse[!duplicated(entrezUniverse[,2]),] # 44955
## remove duplicated Gene Symbol
entrezUniverse3 <- entrezUniverse2[!duplicated(entrezUniverse2[,1]),] # 36634
```

### 2. Create a vector of background (universe) genes

Then we make a vector of background (universe) genes. This object will be used throughout the following analysis. We read the file *list.full.genes.txt*.

```
genes.univ.cattle.org <- read.table("list.full.genes.txt", colClasses = c("character"), header=FALSE)
colnames(genes.univ.cattle.org) <- "SYMBOL"
## merge two files
my.univ.geneID.org <- merge(genes.univ.cattle.org, entrezUniverse3, by ="SYMBOL") # 9434
## remove duplicated Entrez Gene ID
my.univ.geneID2.org <- my.univ.geneID.org[ !duplicated(my.univ.geneID.org[,2]),] # 9372
```

### 3. Create a vector of significant genes

Thirdly, we create a vector of significant genes by reading the file *list.sig.genes.txt*.

```
## read data
genes.cattle.org <- read.table("list.sig.genes.txt", colClasses = c(rep("NULL", 4), "character"),
                             header=TRUE)
colnames(genes.cattle.org) <- "SYMBOL"
## merge two files
my.geneID.org <- merge(genes.cattle.org, entrezUniverse3, by ="SYMBOL") # 222
## remove duplicated Entrez Gene ID
my.geneID2.org <- my.geneID.org[ !duplicated(my.geneID.org[,2]),] # 222
```

## 4. GO enrichment analysis

We perform a GO analysis via the *GOstats* package.

```
library("GOstats")
paraGO <- new("GOHyperGParams", geneIds=my.geneID2.org[,2], universeGeneIds=my.univ.geneID2.org[,2],
             annotation="org.Bt.eg.db", ontology="BP",
             pvalueCutoff=0.05, conditional=TRUE, testDirection="over")
```

GO enrichment analysis for **BP**

```
BP <- hyperGTest(paraGO)
summary(BP)[,c(1,2,7)]
```

| ##    | GOBPID     | Pvalue       |
|-------|------------|--------------|
| ## 1  | GO:0006954 | 0.0006079206 |
| ## 2  | GO:0070098 | 0.0009115902 |
| ## 3  | GO:0006955 | 0.0023174504 |
| ## 4  | GO:0030574 | 0.0029700738 |
| ## 5  | GO:0007601 | 0.0029881189 |
| ## 6  | GO:0098656 | 0.0035411419 |
| ## 7  | GO:0010001 | 0.0048249955 |
| ## 8  | GO:0070588 | 0.0048249955 |
| ## 9  | GO:0007186 | 0.0049613925 |
| ## 10 | GO:1902476 | 0.0060967645 |
| ## 11 | GO:0098660 | 0.0069780201 |
| ## 12 | GO:0045595 | 0.0071961809 |
| ## 13 | GO:0023052 | 0.0078972982 |
| ## 14 | GO:0042330 | 0.0082419568 |
| ## 15 | GO:0007417 | 0.0146624328 |
| ## 16 | GO:0015698 | 0.0152595369 |
| ## 17 | GO:0097192 | 0.0152595369 |
| ## 18 | GO:0097529 | 0.0152595369 |
| ## 19 | GO:0045087 | 0.0153227962 |
| ## 20 | GO:0000189 | 0.0176933159 |
| ## 21 | GO:0006700 | 0.0176933159 |
| ## 22 | GO:0010744 | 0.0176933159 |
| ## 23 | GO:0010807 | 0.0176933159 |
| ## 24 | GO:0010886 | 0.0176933159 |
| ## 25 | GO:0014002 | 0.0176933159 |
| ## 26 | GO:0015820 | 0.0176933159 |
| ## 27 | GO:0030644 | 0.0176933159 |
| ## 28 | GO:0034769 | 0.0176933159 |
| ## 29 | GO:0035494 | 0.0176933159 |
| ## 30 | GO:0048714 | 0.0176933159 |
| ## 31 | GO:0051902 | 0.0176933159 |
| ## 32 | GO:0055083 | 0.0176933159 |
| ## 33 | GO:2000110 | 0.0176933159 |
| ## 34 | GO:2001023 | 0.0176933159 |
| ## 35 | GO:2001223 | 0.0176933159 |
| ## 36 | GO:0044259 | 0.0181055841 |
| ## 37 | GO:0050920 | 0.0181055841 |
| ## 38 | GO:0007165 | 0.0191140673 |

## 39 GO:0007229 0.0211572548  
 ## 40 GO:0048592 0.0211572548  
 ## 41 GO:0007600 0.0229881550  
 ## 42 GO:0070838 0.0247698094  
 ## 43 GO:0030595 0.0278461291  
 ## 44 GO:0050767 0.0305517576  
 ## 45 GO:0045321 0.0309204946  
 ## 46 GO:0017157 0.0314681736  
 ## 47 GO:0098655 0.0316558169  
 ## 48 GO:0042119 0.0344577367  
 ## 49 GO:0002275 0.0344689408  
 ## 50 GO:0002281 0.0350792749  
 ## 51 GO:0002283 0.0350792749  
 ## 52 GO:0002504 0.0350792749  
 ## 53 GO:0002540 0.0350792749  
 ## 54 GO:0008045 0.0350792749  
 ## 55 GO:0017186 0.0350792749  
 ## 56 GO:0030002 0.0350792749  
 ## 57 GO:0033032 0.0350792749  
 ## 58 GO:0034367 0.0350792749  
 ## 59 GO:0034369 0.0350792749  
 ## 60 GO:0034372 0.0350792749  
 ## 61 GO:0035524 0.0350792749  
 ## 62 GO:0035845 0.0350792749  
 ## 63 GO:0043217 0.0350792749  
 ## 64 GO:0043303 0.0350792749  
 ## 65 GO:0045494 0.0350792749  
 ## 66 GO:0045576 0.0350792749  
 ## 67 GO:0046548 0.0350792749  
 ## 68 GO:0046668 0.0350792749  
 ## 69 GO:0060020 0.0350792749  
 ## 70 GO:0071825 0.0350792749  
 ## 71 GO:0090077 0.0350792749  
 ## 72 GO:1901741 0.0350792749  
 ## 73 GO:2001204 0.0350792749  
 ## 74 GO:0070887 0.0356127659  
 ## 75 GO:0071345 0.0392729270  
 ## 76 GO:0007423 0.0416316214  
 ## 77 GO:0007267 0.0421664725  
 ## 78 GO:0006950 0.0429577805  
 ## 79 GO:0002263 0.0433579109  
 ## 80 GO:0042742 0.0433579109  
 ## 81 GO:0048754 0.0433579109

| ##    | Term                                         |
|-------|----------------------------------------------|
| ## 1  | inflammatory response                        |
| ## 2  | chemokine-mediated signaling pathway         |
| ## 3  | immune response                              |
| ## 4  | collagen catabolic process                   |
| ## 5  | visual perception                            |
| ## 6  | anion transmembrane transport                |
| ## 7  | glial cell differentiation                   |
| ## 8  | calcium ion transmembrane transport          |
| ## 9  | G-protein coupled receptor signaling pathway |
| ## 10 | chloride transmembrane transport             |

```

## 11                inorganic ion transmembrane transport
## 12                regulation of cell differentiation
## 13                signaling
## 14                taxis
## 15                central nervous system development
## 16                inorganic anion transport
## 17                extrinsic apoptotic signaling pathway in absence of ligand
## 18                myeloid leukocyte migration
## 19                innate immune response
## 20                MAPK import into nucleus
## 21                C21-steroid hormone biosynthetic process
## 22                positive regulation of macrophage derived foam cell differentiation
## 23                regulation of synaptic vesicle priming
## 24                positive regulation of cholesterol storage
## 25                astrocyte development
## 26                leucine transport
## 27                cellular chloride ion homeostasis
## 28                basement membrane disassembly
## 29                SNARE complex disassembly
## 30                positive regulation of oligodendrocyte differentiation
## 31                negative regulation of mitochondrial depolarization
## 32                monovalent inorganic anion homeostasis
## 33                negative regulation of macrophage apoptotic process
## 34                regulation of response to drug
## 35                negative regulation of neuron migration
## 36                multicellular organismal macromolecule metabolic process
## 37                regulation of chemotaxis
## 38                signal transduction
## 39                integrin-mediated signaling pathway
## 40                eye morphogenesis
## 41                sensory perception
## 42                divalent metal ion transport
## 43                leukocyte chemotaxis
## 44                regulation of neurogenesis
## 45                leukocyte activation
## 46                regulation of exocytosis
## 47                cation transmembrane transport
## 48                neutrophil activation
## 49                myeloid cell activation involved in immune response
## 50                macrophage activation involved in immune response
## 51                neutrophil activation involved in immune response
## 52                antigen processing and presentation of peptide or polysaccharide antigen via MHC class II
## 53                leukotriene production involved in inflammatory response
## 54                motor neuron axon guidance
## 55                peptidyl-pyroglutamic acid biosynthetic process, using glutaminy-peptide cyclotransferase
## 56                cellular anion homeostasis
## 57                regulation of myeloid cell apoptotic process
## 58                macromolecular complex remodeling
## 59                plasma lipoprotein particle remodeling
## 60                very-low-density lipoprotein particle remodeling
## 61                proline transmembrane transport
## 62                photoreceptor cell outer segment organization
## 63                myelin maintenance
## 64                mast cell degranulation

```

```

## 65                                     photoreceptor cell maintenance
## 66                                     mast cell activation
## 67                                     retinal rod cell development
## 68 regulation of retinal cell programmed cell death
## 69                                     Bergmann glial cell differentiation
## 70 protein-lipid complex subunit organization
## 71                                     foam cell differentiation
## 72 positive regulation of myoblast fusion
## 73 regulation of osteoclast development
## 74 cellular response to chemical stimulus
## 75 cellular response to cytokine stimulus
## 76                                     sensory organ development
## 77                                     cell-cell signaling
## 78                                     response to stress
## 79 cell activation involved in immune response
## 80                                     defense response to bacterium
## 81 branching morphogenesis of an epithelial tube

```

GO enrichment analysis for MF

```

ontology(paraGO) <- "MF"
MF <- hyperGTest(paraGO)
summary(MF)[,c(1,2,7)]

```

```

##      GOMFID      Pvalue
## 1  GO:0005215 0.0002468818
## 2  GO:0001968 0.0008930110
## 3  GO:0008009 0.0008930110
## 4  GO:0043394 0.0008930110
## 5  GO:0005262 0.0012789322
## 6  GO:0008201 0.0040241894
## 7  GO:0072509 0.0040241894
## 8  GO:0005216 0.0043609993
## 9  GO:0015267 0.0052333776
## 10 GO:0046873 0.0052333776
## 11 GO:0022832 0.0053891818
## 12 GO:0022891 0.0075549647
## 13 GO:0005254 0.0078795607
## 14 GO:0005518 0.0078795607
## 15 GO:0008324 0.0079429281
## 16 GO:0001948 0.0092431400
## 17 GO:0015103 0.0149672001
## 18 GO:0022843 0.0149672001
## 19 GO:0001637 0.0175310446
## 20 GO:0004383 0.0175310446
## 21 GO:0004465 0.0175310446
## 22 GO:0004613 0.0175310446
## 23 GO:0005298 0.0175310446
## 24 GO:0005416 0.0175310446
## 25 GO:0008331 0.0175310446
## 26 GO:0008445 0.0175310446
## 27 GO:0016494 0.0175310446
## 28 GO:0019905 0.0175310446

```

```

## 29 GO:0031433 0.0175310446
## 30 GO:0031726 0.0175310446
## 31 GO:0032027 0.0175310446
## 32 GO:0034185 0.0175310446
## 33 GO:0005126 0.0333439962
## 34 GO:0003796 0.0347610445
## 35 GO:0004090 0.0347610445
## 36 GO:0004890 0.0347610445
## 37 GO:0005104 0.0347610445
## 38 GO:0005149 0.0347610445
## 39 GO:0005328 0.0347610445
## 40 GO:0016603 0.0347610445
## 41 GO:0050544 0.0347610445
## 42 GO:1901567 0.0347610445
## 43 GO:0004197 0.0385200354
## 44 GO:0004872 0.0407201611
## 45 GO:0004888 0.0453467861
## 46 GO:0005539 0.0488510844
##
##                                     Term
## 1                                     transporter activity
## 2                                     fibronectin binding
## 3                                     chemokine activity
## 4                                     proteoglycan binding
## 5                                     calcium channel activity
## 6                                     heparin binding
## 7  divalent inorganic cation transmembrane transporter activity
## 8                                     ion channel activity
## 9                                     channel activity
## 10                                    metal ion transmembrane transporter activity
## 11                                    voltage-gated channel activity
## 12  substrate-specific transmembrane transporter activity
## 13                                    chloride channel activity
## 14                                    collagen binding
## 15                                    cation transmembrane transporter activity
## 16                                    glycoprotein binding
## 17  inorganic anion transmembrane transporter activity
## 18                                    voltage-gated cation channel activity
## 19  G-protein coupled chemoattractant receptor activity
## 20                                    guanylate cyclase activity
## 21                                    lipoprotein lipase activity
## 22  phosphoenolpyruvate carboxykinase (GTP) activity
## 23                                    proline:sodium symporter activity
## 24                                    cation:amino acid symporter activity
## 25  high voltage-gated calcium channel activity
## 26                                    D-aspartate oxidase activity
## 27  C-X-C chemokine receptor activity
## 28                                    syntaxin binding
## 29                                    telethonin binding
## 30  CCR1 chemokine receptor binding
## 31  myosin light chain binding
## 32  apolipoprotein binding
## 33  cytokine receptor binding
## 34                                    lysozyme activity
## 35  carbonyl reductase (NADPH) activity

```

```

## 36                GABA-A receptor activity
## 37      fibroblast growth factor receptor binding
## 38                interleukin-1 receptor binding
## 39      neurotransmitter:sodium symporter activity
## 40      glutaminyl-peptide cyclotransferase activity
## 41                arachidonic acid binding
## 42                fatty acid derivative binding
## 43                cysteine-type endopeptidase activity
## 44                receptor activity
## 45      transmembrane signaling receptor activity
## 46                glycosaminoglycan binding

```

GO enrichment analysis for CC

```

ontology(paraGO) <- "CC"
CC <- hyperGTest(paraGO)
summary(CC)[,c(1,2,7)]

```

| ##    | GOCCID     | Pvalue      | Term                                        |
|-------|------------|-------------|---------------------------------------------|
| ## 1  | GO:0016021 | 0.005045329 | integral component of membrane              |
| ## 2  | GO:0034707 | 0.005182821 | chloride channel complex                    |
| ## 3  | GO:0005773 | 0.006792866 | vacuole                                     |
| ## 4  | GO:0005886 | 0.007282896 | plasma membrane                             |
| ## 5  | GO:0005576 | 0.008060376 | extracellular region                        |
| ## 6  | GO:0005764 | 0.011217919 | lysosome                                    |
| ## 7  | GO:1902495 | 0.014224360 | transmembrane transporter complex           |
| ## 8  | GO:0042613 | 0.019207317 | MHC class II protein complex                |
| ## 9  | GO:0042627 | 0.019207317 | chylomicron                                 |
| ## 10 | GO:0070044 | 0.019207317 | synaptobrevin 2-SNAP-25-syntaxin-1a complex |
| ## 11 | GO:0044459 | 0.022374587 | plasma membrane part                        |
| ## 12 | GO:0005578 | 0.030738637 | proteinaceous extracellular matrix          |
| ## 13 | GO:0009986 | 0.031627823 | cell surface                                |
| ## 14 | GO:0005615 | 0.036921117 | extracellular space                         |
| ## 15 | GO:0005891 | 0.038051458 | voltage-gated calcium channel complex       |
| ## 16 | GO:0042629 | 0.038051458 | mast cell granule                           |
| ## 17 | GO:0005777 | 0.048355996 | peroxisome                                  |

## 5. MeSH enrichment analysis

Then, we perform a MeSH ORA for the category **Chemicals and Drugs** by setting 'category="D"':

```

library(meshr)
library(MeSH.db)
library("org.MeSH.Bta.db")
meshParams <- new("MeSHHyperGParams", geneIds = my.geneID2.org[,2],
                 universeGeneIds = my.univ.geneID2.org[,2],
                 annotation = "org.MeSH.Bta.db", category = "D",
                 database = "gene2pubmed", pvalueCutoff = 0.05, pAdjust = "none")
meshR <- meshHyperGTest(meshParams)
summary(meshR)[!duplicated(summary(meshR)[,7]),c(1,2,7)]

```

| ## | MESHID | Pvalue |
|----|--------|--------|
|----|--------|--------|

## 5525 D053829 0.0004297762  
## 3129 D011971 0.0004484468  
## 5625 D055607 0.0005604262  
## 4132 D015703 0.0007378416  
## 1420 D005136 0.0008895950  
## 1725 D007371 0.0009030941  
## 3874 D012313 0.0009051932  
## 4723 D018121 0.0016549196  
## 4711 D018118 0.0032580471  
## 4828 D019041 0.0032580471  
## 5075 D040281 0.0039522766  
## 2477 D009418 0.0048546773  
## 1088 D002403 0.0053452724  
## 1708 D006684 0.0053452724  
## 1807 D007378 0.0053452724  
## 2936 D011257 0.0063921646  
## 4920 D036341 0.0065851885  
## 1612 D006133 0.0070063374  
## 4265 D016212 0.0073567061  
## 3119 D011759 0.0078929281  
## 4120 D013859 0.0078929281  
## 4663 D017027 0.0078929281  
## 4745 D018123 0.0078929281  
## 5181 D042501 0.0078929281  
## 4586 D016692 0.0108781888  
## 4685 D017468 0.0108781888  
## 5509 D053779 0.0108781888  
## 4426 D016326 0.0121056751  
## 1115 D002786 0.0142790447  
## 2431 D009414 0.0142790447  
## 3188 D011994 0.0146301601  
## 27 D000939 0.0164406947  
## 5109 D040301 0.0184670642  
## 1947 D008565 0.0201170561  
## 1 D000116 0.0237255531  
## 10 D000485 0.0237255531  
## 21 D000631 0.0237255531  
## 23 D000683 0.0237255531  
## 25 D000907 0.0237255531  
## 83 D000949 0.0237255531  
## 142 D000953 0.0237255531  
## 145 D001053 0.0237255531  
## 157 D001056 0.0237255531  
## 197 D001425 0.0237255531  
## 202 D001571 0.0237255531  
## 610 D002273 0.0237255531  
## 1113 D002738 0.0237255531  
## 1144 D002914 0.0237255531  
## 1399 D004205 0.0237255531  
## 1611 D005466 0.0237255531  
## 1695 D006632 0.0237255531  
## 1699 D006683 0.0237255531  
## 1724 D006711 0.0237255531  
## 1821 D007653 0.0237255531



## 2529 D009496 0.0237255531  
## 2535 D009961 0.0237255531  
## 3112 D011458 0.0237255531  
## 4127 D014304 0.0237255531  
## 4240 D015846 0.0237255531  
## 4243 D015847 0.0237255531  
## 4254 D015922 0.0237255531  
## 4257 D016028 0.0237255531  
## 4259 D016169 0.0237255531  
## 4585 D016623 0.0237255531  
## 4703 D017476 0.0237255531  
## 4706 D017981 0.0237255531  
## 4739 D018122 0.0237255531  
## 4783 D018679 0.0237255531  
## 4784 D018801 0.0237255531  
## 4818 D018926 0.0237255531  
## 4866 D019323 0.0237255531  
## 4873 D019881 0.0237255531  
## 4875 D019908 0.0237255531  
## 4881 D020098 0.0237255531  
## 4911 D024061 0.0237255531  
## 4915 D027982 0.0237255531  
## 5066 D037521 0.0237255531  
## 5178 D040881 0.0237255531  
## 5208 D050480 0.0237255531  
## 5209 D050705 0.0237255531  
## 5263 D050998 0.0237255531  
## 5342 D051856 0.0237255531  
## 5343 D051906 0.0237255531  
## 5357 D051928 0.0237255531  
## 5359 D051940 0.0237255531  
## 5372 D052218 0.0237255531  
## 5422 D053304 0.0237255531  
## 5431 D053493 0.0237255531  
## 5436 D053707 0.0237255531  
## 5593 D054370 0.0237255531  
## 5597 D054426 0.0237255531  
## 5636 D055654 0.0237255531  
## 5642 D055655 0.0237255531  
## 5650 D056655 0.0237255531  
## 5652 D059866 0.0237255531  
## 4841 D019253 0.0267667853  
## 5602 D055415 0.0267667853  
## 612 D002352 0.0311028987  
## 5018 D037181 0.0316253540  
## 207 D002135 0.0323346420  
## 1263 D003488 0.0323346420  
## 2539 D010455 0.0362125161  
## 1831 D008070 0.0363565401  
## 1401 D004338 0.0368008320  
## 4884 D020672 0.0368008320  
## 5265 D051197 0.0368008320  
## 1146 D003094 0.0394363350  
## 5373 D052247 0.0422755912

```

## 2    D000276 0.0468906800
## 151  D001054 0.0468906800
## 203  D002097 0.0468906800
## 602  D002217 0.0468906800
## 1822 D008049 0.0468906800
## 1924 D008071 0.0468906800
## 1940 D008079 0.0468906800
## 2910 D010740 0.0468906800
## 2919 D010928 0.0468906800
## 3113 D011464 0.0468906800
## 4128 D015054 0.0468906800
## 4262 D016201 0.0468906800
## 4781 D018336 0.0468906800
## 4787 D018821 0.0468906800
## 4801 D018925 0.0468906800
## 4820 D018996 0.0468906800
## 4868 D019363 0.0468906800
## 4907 D020866 0.0468906800
## 5068 D039481 0.0468906800
## 5189 D043925 0.0468906800
## 5202 D045726 0.0468906800
## 5210 D050799 0.0468906800
## 5260 D050804 0.0468906800
## 5340 D051784 0.0468906800
## 5346 D051920 0.0468906800
## 5367 D052118 0.0468906800
## 5451 D053764 0.0468906800
## 5542 D054340 0.0468906800
## 5555 D054341 0.0468906800
## 5562 D054342 0.0468906800
## 5572 D054345 0.0468906800
## 5579 D054349 0.0468906800
## 5586 D054360 0.0468906800
## 5656 D062367 0.0468906800
## 5659 D064547 0.0468906800
## 165  D001324 0.0480326549
## 5456 D053773 0.0480326549
##
##                                     MESHTERM
## 5525          Amyloid Precursor Protein Secretases
## 3129          Receptors, Immunologic
## 5625          Receptors, Natural Killer Cell
## 4132          Antigens, CD
## 1420          Eye Proteins
## 1725          Interferon-gamma
## 3874          RNA
## 4723          Receptors, Cytokine
## 4711          Chloride Channels
## 4828          L-Selectin
## 5075          Vascular Endothelial Growth Factor Receptor-1
## 2477          S100 Proteins
## 1088          Cathepsins
## 1708          HLA-DR Antigens
## 1807          Interleukins
## 2936          Pregnancy Proteins

```

## 4920 Intercellular Signaling Peptides and Proteins  
 ## 1612 Growth Substances  
 ## 4265 Transforming Growth Factor beta  
 ## 3119 Pyrrolidines  
 ## 4120 Thiocarbamates  
 ## 4663 Protein Tyrosine Phosphatases  
 ## 4745 Receptors, Interleukin  
 ## 5181 Angiogenic Proteins  
 ## 4586 Receptors, Antigen, T-Cell, gamma-delta  
 ## 4685 Receptors, Fibroblast Growth Factor  
 ## 5509 Latent TGF-beta Binding Proteins  
 ## 4426 Extracellular Matrix Proteins  
 ## 1115 Cholesterol Side-Chain Cleavage Enzyme  
 ## 2431 Nerve Growth Factors  
 ## 3188 Recombinant Proteins  
 ## 27 Epitopes  
 ## 5109 Vascular Endothelial Growth Factor Receptor-2  
 ## 1947 Membrane Proteins  
 ## 1 Acetylgalactosamine  
 ## 10 Allergens  
 ## 21 Aminopyridines  
 ## 23 Serum Amyloid P-Component  
 ## 25 Antibodies, Bacterial  
 ## 83 Histocompatibility Antigens Class II  
 ## 142 Antigens, Protozoan  
 ## 145 Apolipoproteins  
 ## 157 Apolipoproteins C  
 ## 197 Bacterial Outer Membrane Proteins  
 ## 202 Benzoflavones  
 ## 610 Carcinogens  
 ## 1113 Chloroquine  
 ## 1144 Chylomicrons  
 ## 1399 Cromolyn Sodium  
 ## 1611 Fluorocarbons  
 ## 1695 Histamine  
 ## 1699 HLA-DQ Antigens  
 ## 1724 Homocystine  
 ## 1821 Ketocholesterols  
 ## 2529 Neurotensin  
 ## 2535 Orosomucoid  
 ## 3112 Prostaglandins E  
 ## 4127 Triolein  
 ## 4240 Monokines  
 ## 4243 Interleukin-4  
 ## 4254 Complement C1q  
 ## 4257 Receptors, Leukocyte-Adhesion  
 ## 4259 Lymphocyte Function-Associated Antigen-1  
 ## 4585 Ion Pumps  
 ## 4703 Receptors, Neuropeptide Y  
 ## 4706 Receptors, Neurotransmitter  
 ## 4739 Antigens, CD80  
 ## 4783 Cholinergic Agonists  
 ## 4784 Antigens, CD2  
 ## 4818 Anti-Allergic Agents

## 4866                                   omega-N-Methylarginine  
 ## 4873                                   Aminoacyltransferases  
 ## 4875                                   Proto-Oncogene Proteins c-raf  
 ## 4881                                   Natriuretic Peptide, C-Type  
 ## 4911                                   Collagen Type III  
 ## 4915                                   Sodium-Bicarbonate Symporters  
 ## 5066                                   Virulence Factors  
 ## 5178                                   Antigens, CD11a  
 ## 5208 Plasma Membrane Neurotransmitter Transport Proteins  
 ## 5209                                   Receptors, Guanylate Cyclase-Coupled  
 ## 5263                                   bcl-2 Homologous Antagonist-Killer Protein  
 ## 5342                                   Fanconi Anemia Complementation Group Proteins  
 ## 5343                                   Smad7 Protein  
 ## 5357                                   Antigens, CD47  
 ## 5359                                   Antigens, CD86  
 ## 5372                                   Fanconi Anemia Complementation Group C Protein  
 ## 5422                                   Apolipoprotein C-II  
 ## 5431                                   Cholestanetriol 26-Monooxygenase  
 ## 5436                                   Receptors, Interleukin-12  
 ## 5593                                   Chemokine CXCL9  
 ## 5597                                   Chemokine CXCL2  
 ## 5636                                   NK Cell Lectin-Like Receptor Subfamily C  
 ## 5642                                   NK Cell Lectin-Like Receptor Subfamily K  
 ## 5650                                   Cathepsin H  
 ## 5652                                   HLA-DQ beta-Chains  
 ## 4841                                   Proto-Oncogene Proteins c-bcl-2  
 ## 5602                                   Bone Morphogenetic Protein 4  
 ## 612                                   Carrier Proteins  
 ## 5018                                   Lectins, C-Type  
 ## 207                                   Calcium-Binding Proteins  
 ## 1263                                   Cyanogen Bromide  
 ## 2539                                   Peptides  
 ## 1831                                   Lipopolysaccharides  
 ## 1401                                   Drug Combinations  
 ## 4884                                   I-kappa B Proteins  
 ## 5265                                   Toll-Like Receptor 4  
 ## 1146                                   Collagen  
 ## 5373                                   Nitric Oxide Synthase Type II  
 ## 2                                   Adjuvants, Immunologic  
 ## 151                                   Apolipoproteins A  
 ## 203                                   C-Reactive Protein  
 ## 602                                   Carbachol  
 ## 1822                                   Lipase  
 ## 1924                                   Lipoprotein Lipase  
 ## 1940                                   Lipoproteins, VLDL  
 ## 2910                                   Phospholipases  
 ## 2919                                   Placental Lactogen  
 ## 3113                                   Epoprostenol  
 ## 4128                                   Zymosan  
 ## 4262                                   Receptors, Lymphocyte Homing  
 ## 4781                                   Receptors, Aryl Hydrocarbon  
 ## 4787                                   Antigens, CD18  
 ## 4801                                   Chemokines  
 ## 4820                                   Myelin P2 Protein

```

## 4868          Cytochrome P-450 CYP1A1
## 4907          omega-Conotoxin GVIA
## 5068          Antigens, CD11b
## 5189          Angiogenesis Inducing Agents
## 5202          Metalloproteases
## 5210          STAT5 Transcription Factor
## 5260          D-Aspartate Oxidase
## 5340          Aryl Hydrocarbon Receptor Nuclear Translocator
## 5346          NK Cell Lectin-Like Receptor Subfamily D
## 5367          Lysosomal-Associated Membrane Protein 1
## 5451          Presenilin-1
## 5542          Receptors, KIR
## 5555          Receptors, KIR3DL1
## 5562          Receptors, KIR2DL1
## 5572          Receptors, KIR2DL4
## 5579          Receptors, KIR3DS1
## 5586          Chemokine CXCL1
## 5656          ortho-Aminobenzoates
## 5659          Myxovirus Resistance Proteins
## 165          Autoantigens
## 5456          Transforming Growth Factor beta1

```

Switching to a different category is easily done by the 'category<-' function. Here, we use **Diseases** (category = "C").

```

category(meshParams) <- "C"
meshR <- meshHyperGTest(meshParams)
summary(meshR)[!duplicated(summary(meshR)[,7]),c(1,2,7)]

```

| ##      | MESHID  | Pvalue       | MESHTERM                               |
|---------|---------|--------------|----------------------------------------|
| ## 864  | D008414 | 3.250507e-05 | Mastitis, Bovine                       |
| ## 820  | D005334 | 1.654920e-03 | Fever                                  |
| ## 75   | D002418 | 5.757735e-03 | Cattle Diseases                        |
| ## 1192 | D010283 | 1.087819e-02 | Paratuberculosis                       |
| ## 1318 | D014380 | 1.087819e-02 | Tuberculosis, Bovine                   |
| ## 1    | D000034 | 2.372555e-02 | Abortion, Veterinary                   |
| ## 69   | D002007 | 2.372555e-02 | Brucellosis, Bovine                    |
| ## 817  | D003092 | 2.372555e-02 | Colitis                                |
| ## 818  | D003320 | 2.372555e-02 | Corneal Ulcer                          |
| ## 819  | D005199 | 2.372555e-02 | Fanconi Anemia                         |
| ## 823  | D007662 | 2.372555e-02 | Ketosis                                |
| ## 824  | D007794 | 2.372555e-02 | Lameness, Animal                       |
| ## 855  | D008268 | 2.372555e-02 | Macular Degeneration                   |
| ## 1287 | D010922 | 2.372555e-02 | Placenta Diseases                      |
| ## 1288 | D011248 | 2.372555e-02 | Pregnancy Complications                |
| ## 1316 | D012766 | 2.372555e-02 | Pasteurellosis, Pneumonic              |
| ## 1341 | D015228 | 2.372555e-02 | Hypertriglyceridemia                   |
| ## 1343 | D015658 | 2.372555e-02 | HIV Infections                         |
| ## 1344 | D018370 | 2.372555e-02 | Leukocyte-Adhesion Deficiency Syndrome |
| ## 1651 | D020964 | 2.372555e-02 | Embryo Loss                            |
| ## 857  | D008382 | 4.689068e-02 | Marfan Syndrome                        |
| ## 1348 | D020022 | 4.803265e-02 | Genetic Predisposition to Disease      |

MeSH ORA for **Anatomy** (category = "A").

```

category(meshParams) <- "A"
meshR <- meshHyperGTest(meshParams)
summary(meshR)[!duplicated(summary(meshR)[,7]),c(1,2,7)]

```

| ## | MESHID | Pvalue  | MESHTERM     |                                 |
|----|--------|---------|--------------|---------------------------------|
| ## | 4202   | D009504 | 4.891771e-06 | Neutrophils                     |
| ## | 4831   | D012867 | 4.484468e-04 | Skin                            |
| ## | 1610   | D008892 | 4.601818e-04 | Milk                            |
| ## | 62     | D000653 | 5.604262e-04 | Amniotic Fluid                  |
| ## | 5047   | D014822 | 5.604262e-04 | Vitreous Body                   |
| ## | 73     | D002460 | 1.156952e-03 | Cell Line                       |
| ## | 4828   | D012708 | 1.654920e-03 | Sertoli Cells                   |
| ## | 4918   | D014132 | 4.854677e-03 | Trachea                         |
| ## | 1469   | D007908 | 5.871500e-03 | Lens, Crystalline               |
| ## | 1297   | D007668 | 7.562931e-03 | Kidney                          |
| ## | 5123   | D019169 | 1.087819e-02 | Jurkat Cells                    |
| ## | 869    | D002462 | 1.862338e-02 | Cell Membrane                   |
| ## | 5200   | D042783 | 1.894443e-02 | Endothelial Cells               |
| ## | 1552   | D008264 | 2.062578e-02 | Macrophages                     |
| ## | 4611   | D012160 | 2.110818e-02 | Retina                          |
| ## | 4560   | D010902 | 2.224343e-02 | Pituitary Gland                 |
| ## | 5052   | D016176 | 2.224343e-02 | T-Lymphocyte Subsets            |
| ## | 5136   | D020419 | 2.224343e-02 | Photoreceptor Cells, Vertebrate |
| ## | 58     | D000482 | 2.372555e-02 | Allantois                       |
| ## | 1204   | D002883 | 2.372555e-02 | Chromosomes, Human, Pair 14     |
| ## | 1247   | D003319 | 2.372555e-02 | Corneal Stroma                  |
| ## | 1262   | D005243 | 2.372555e-02 | Feces                           |
| ## | 1551   | D008125 | 2.372555e-02 | Locus Coeruleus                 |
| ## | 4917   | D013666 | 2.372555e-02 | Tears                           |
| ## | 5616   | D050824 | 2.372555e-02 | Carpal Joints                   |
| ## | 4285   | D009865 | 2.408291e-02 | Oocytes                         |
| ## | 844    | D002461 | 3.680083e-02 | Cell Line, Transformed          |
| ## | 1214   | D003126 | 4.227559e-02 | Colostrum                       |
| ## | 4157   | D009000 | 4.227559e-02 | Monocytes                       |
| ## | 5158   | D021962 | 4.227559e-02 | Membrane Microdomains           |
| ## | 68     | D001933 | 4.689068e-02 | Brain Stem                      |
| ## | 1198   | D002823 | 4.689068e-02 | Chorion                         |
| ## | 1207   | D002894 | 4.689068e-02 | Chromosomes, Human, Pair 4      |
| ## | 1248   | D004817 | 4.689068e-02 | Epidermis                       |
| ## | 1292   | D005920 | 4.689068e-02 | Glomerular Mesangium            |
| ## | 1447   | D007694 | 4.689068e-02 | Killer Cells, Natural           |
| ## | 1546   | D007985 | 4.689068e-02 | Leydig Cells                    |
| ## | 1607   | D008648 | 4.689068e-02 | Mesoderm                        |
| ## | 4199   | D009457 | 4.689068e-02 | Neuroglia                       |
| ## | 4557   | D010586 | 4.689068e-02 | Phagocytes                      |
| ## | 4821   | D012463 | 4.689068e-02 | Saliva                          |
| ## | 1      | D000302 | 4.803265e-02 | Adrenal Cortex                  |
| ## | 4953   | D014327 | 4.943893e-02 | Trophoblasts                    |

MeSH ORA for **Phenomena and Processes** (category = "G").

```
category(meshParams) <- "G"
meshR <- meshHyperGTest(meshParams)
summary(meshR)[!duplicated(summary(meshR)[,7]),c(1,2,7)]
```

| ## | MESHID | Pvalue  | MESHTERM    |                                           |
|----|--------|---------|-------------|-------------------------------------------|
| ## | 1843   | D000595 | 0.001667036 | Amino Acid Sequence                       |
| ## | 17567  | D018375 | 0.003258047 | Neutrophil Activation                     |
| ## | 5      | D000483 | 0.004055151 | Alleles                                   |
| ## | 13517  | D010802 | 0.005081324 | Phylogeny                                 |
| ## | 11769  | D007774 | 0.005360661 | Lactation                                 |
| ## | 16289  | D017386 | 0.006583581 | Sequence Homology, Amino Acid             |
| ## | 15745  | D014162 | 0.007807192 | Transfection                              |
| ## | 6853   | D002633 | 0.007892928 | Chemotaxis                                |
| ## | 7273   | D005838 | 0.008071564 | Genotype                                  |
| ## | 6894   | D005810 | 0.010280847 | Multigene Family                          |
| ## | 16205  | D016922 | 0.010878189 | Cell Aging                                |
| ## | 11554  | D006031 | 0.018469771 | Glycosylation                             |
| ## | 11686  | D006720 | 0.022243427 | Homozygote                                |
| ## | 14818  | D011270 | 0.022917140 | Pregnancy, Animal                         |
| ## | 6884   | D002883 | 0.023725553 | Chromosomes, Human, Pair 14               |
| ## | 14813  | D011232 | 0.023725553 | Chemical Precipitation                    |
| ## | 16194  | D015321 | 0.023725553 | Gene Rearrangement                        |
| ## | 18132  | D047108 | 0.024817577 | Embryonic Development                     |
| ## | 17573  | D018919 | 0.025341189 | Neovascularization, Physiologic           |
| ## | 6253   | D002452 | 0.026766785 | Cell Count                                |
| ## | 16213  | D017384 | 0.039436335 | Sequence Deletion                         |
| ## | 17969  | D020816 | 0.041048172 | Amino Acid Motifs                         |
| ## | 13478  | D008213 | 0.042275591 | Lymphocyte Activation                     |
| ## | 14047  | D011110 | 0.043060921 | Polymorphism, Genetic                     |
| ## | 15380  | D014158 | 0.044402394 | Transcription, Genetic                    |
| ## | 14947  | D012150 | 0.045979017 | Polymorphism, Restriction Fragment Length |
| ## | 1      | D000220 | 0.046890680 | Adaptation, Biological                    |
| ## | 6242   | D001770 | 0.046890680 | Blood Bactericidal Activity               |
| ## | 6887   | D002894 | 0.046890680 | Chromosomes, Human, Pair 4                |
| ## | 17549  | D017951 | 0.046890680 | Antigen Presentation                      |
| ## | 17967  | D020131 | 0.046890680 | Genes, Duplicate                          |
| ## | 17664  | D020022 | 0.048032655 | Genetic Predisposition to Disease         |
| ## | 15177  | D013329 | 0.049061161 | Structure-Activity Relationship           |

## 6. Session Information

```
sessionInfo()
```

```
## R version 3.1.2 (2014-10-31)
## Platform: x86_64-apple-darwin13.4.0 (64-bit)
##
## locale:
## [1] en_US.UTF-8/en_US.UTF-8/en_US.UTF-8/C/en_US.UTF-8/en_US.UTF-8
##
## attached base packages:
## [1] grid      parallel  stats4    stats     graphics  grDevices  utils
```

```

## [8] datasets methods base
##
## other attached packages:
## [1] org.MeSH.Bta.db_1.2.0      meshr_1.2.2
## [3] org.MeSH.Syn.db_1.2.0      org.MeSH.Bsu.168.db_1.2.0
## [5] org.MeSH.Atu.K84.db_1.2.0  org.MeSH.Aca.db_1.2.0
## [7] org.MeSH.Hsa.db_1.2.0      MeSH.PCR.db_1.2.0
## [9] MeSH.AOR.db_1.2.0          MeSH.db_1.2.0
## [11] MeSHDbi_1.2.0              org.Hs.eg.db_3.0.0
## [13] cummeRbund_2.8.2           Gviz_1.10.2
## [15] rtracklayer_1.26.2         GenomicRanges_1.18.3
## [17] fastcluster_1.1.13         reshape2_1.4
## [19] ggplot2_1.0.0              fdrtool_1.2.13
## [21] GOstats_2.32.0             graph_1.44.0
## [23] Category_2.32.0           GO.db_3.0.0
## [25] Matrix_1.1-4               org.Bt.eg.db_3.0.0
## [27] RSQLite_1.0.0              DBI_0.3.1
## [29] AnnotationDbi_1.28.1       GenomeInfoDb_1.2.3
## [31] IRanges_2.0.0              S4Vectors_0.4.0
## [33] Biobase_2.26.0            BiocGenerics_0.12.1
##
## loaded via a namespace (and not attached):
## [1] acepack_1.3-3.3            annotate_1.44.0
## [3] AnnotationForge_1.8.1      base64enc_0.1-2
## [5] BatchJobs_1.5              BBmisc_1.8
## [7] BiocParallel_1.0.0         biomaRt_2.22.0
## [9] Biostrings_2.34.0          biovizBase_1.14.0
## [11] bitops_1.0-6               brew_1.0-6
## [13] BSgenome_1.34.0            checkmate_1.5.0
## [15] cluster_1.15.3             codetools_0.2-9
## [17] colorspace_1.2-4           dichromat_2.0-0
## [19] digest_0.6.4               evaluate_0.5.5
## [21] fail_1.2                    foreach_1.4.2
## [23] foreign_0.8-61             formatR_1.0
## [25] Formula_1.1-2              genefilter_1.48.1
## [27] GenomicAlignments_1.2.1    GenomicFeatures_1.18.2
## [29] GSEABase_1.28.0            gtable_0.1.2
## [31] Hmisc_3.14-5               htmltools_0.2.6
## [33] iterators_1.0.7            knitr_1.8
## [35] lattice_0.20-29            latticeExtra_0.6-26
## [37] MASS_7.3-35                matrixStats_0.10.3
## [39] munsell_0.4.2              nnet_7.3-8
## [41] plyr_1.8.1                  proto_0.3-10
## [43] R.methodsS3_1.6.1           RBGL_1.42.0
## [45] RColorBrewer_1.0-5         Rcpp_0.11.3
## [47] RCurl_1.95-4.3             rmarkdown_0.3.10
## [49] rpart_4.1-8                 Rsamtools_1.18.2
## [51] scales_0.2.4                sendmailR_1.2-1
## [53] splines_3.1.2              stringr_0.6.2
## [55] survival_2.37-7            tools_3.1.2
## [57] VariantAnnotation_1.12.4    XML_3.98-1.1
## [59] xtable_1.7-4                XVector_0.6.0
## [61] yaml_2.1.13                 zlibbioc_1.12.0

```
